# Supplementary material for: Poor Air Quality Is Linked to Stress in Honeybees and Can Be Compounded by the Presence of Disease
Source: MDPI journal article supplement (doi:10.3390/insects14080689), 2023-08-04
Supplement: s1 [file s1]

## Supplemental Information

**Table S1.** Primers for *Nosema* quantification as well as for each gene expression target. The oligonucleotide sequence is provided along with the product length and a reference source for each primer set.

| Target                                              | Primer name | Primer Sequence                     | Product Length (bp) | Reference |
|-----------------------------------------------------|-------------|-------------------------------------|---------------------|-----------|
| <i>Nosema apis</i>                                  | F-NAPIS     | GGGGGCATGTCTTTGAC<br>GTACTATGTA     | 321                 | [1]       |
|                                                     | R-NAPIS     | GGGGGGCGTTTAAAAT<br>GTGAAACAACATATG |                     |           |
| <i>Nosema ceranae</i>                               | F-NCERANAE  | CGGCGACGATGTGATAT<br>GAAAATATTAA    | 218                 | [1]       |
|                                                     | R-NCERANAE  | CCCGGTCATTCTCAAAC<br>AAAAAACCG      |                     |           |
| <i>Heat Shock Protein 70 (HSP70)</i>                | F-HSP70     | CGCCTTCACGGACACAG<br>A              | 60                  | [2]       |
|                                                     | R-HSP70     | TTCATTGCGACCTGATT<br>TTTG           |                     |           |
| <i>Vitellogenin (Vg)</i>                            | Vg-F        | CTGTTCGATGGAGAAGG<br>GAACT          | 370                 | [3]       |
|                                                     | Vg-R        | CTTGCCCTACGAGTCTTG<br>CTGT          |                     |           |
| <i>Prophenoloxidase (ProPO)</i>                     | F-ProPO     | ACAGATCCTGTATGGAT<br>TGC            | 61                  | [4]       |
|                                                     | R-ProPO     | TCTTGGACGAGTAAAC<br>GAT             |                     |           |
| <i>Ribosomal Protein S5 (RpS5) (reference gene)</i> | RpS5-F      | AATTATTTGGTCGCTGG<br>AATTG          | 115                 | [3]       |
|                                                     | RpS5-R      | TAACGTCCAGCAGAAT<br>GTGGTA          |                     |           |

**Table S2.** Spearman rank correlation values showing the relationship between maximum air temperatures and Air Quality Index (AQI) values. \* and **Bold** indicate significant differences at the alpha = 0.05 level. *ProPO*: Prophenoloxidase gene; *Vg*: Vitellogenin gene; *HSP70*: Heat Shock Protein 70 gene

|                     | Maximum Temperature | <i>Varroa</i> | <i>N. ceranae</i> | <i>ProPO</i>   | <i>Vg</i>     | <i>HSP70</i> |
|---------------------|---------------------|---------------|-------------------|----------------|---------------|--------------|
| AQI                 | <b>0.277*</b>       | 0.029         | 0.078             | <b>-0.284*</b> | <b>0.260*</b> | -0.244       |
| Maximum Temperature |                     | -0.336        | -0.146            | -0.093         | -0.007        | 0.204        |

**Figure S1.** (A) The maximum daily temperatures measured at the closest weather station to each apiary. (B) The corresponding air quality index value from each weather station closest to the apiary sampled. Each dot represents a different apiary location. The lines represent the mean of the maximum daily temperature or air quality value.

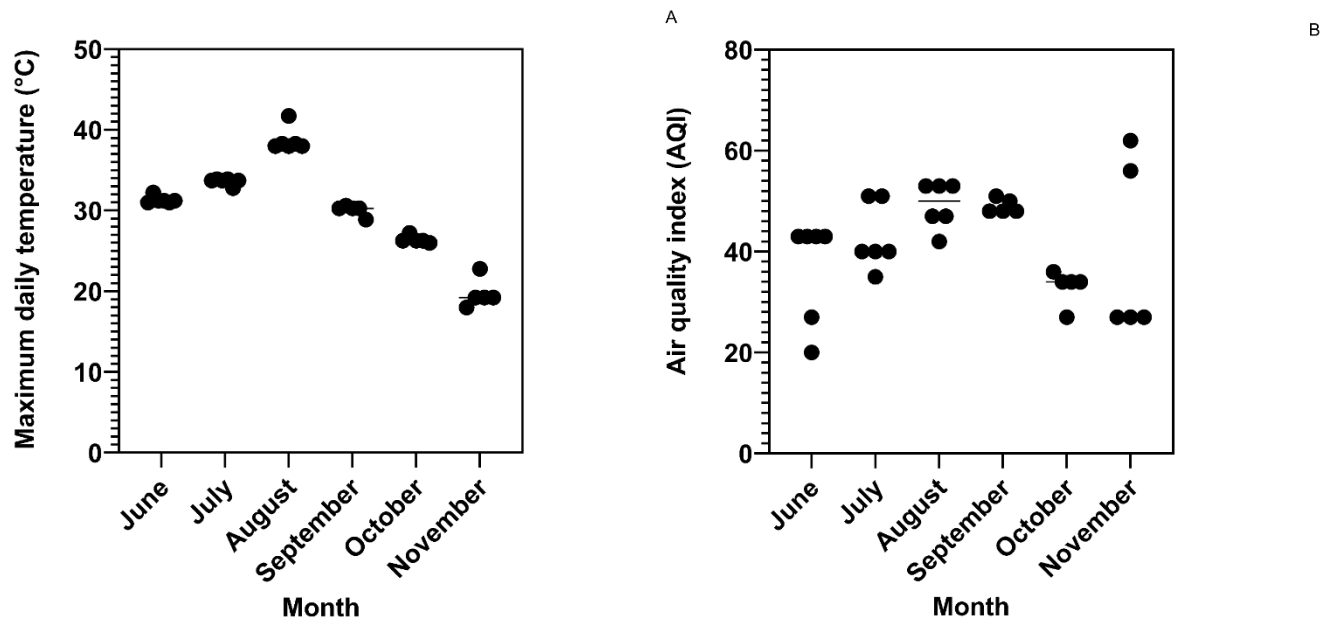

**Figure S2.** A box plot representation of the medians and inter-quartile ranges of expression levels of (A) *Heat Shock Protein (HSP70)*, (B) *Vitellogenin (Vg)*, and (C) *Prophenoloxidase (ProPO)* genes across the months the hives were sampled for forager and in-hive bees. The letters above each box plot represent significant differences at the alpha = 0.05 level. The numbers above each letter represent the sample size of the hives sampled for each month.

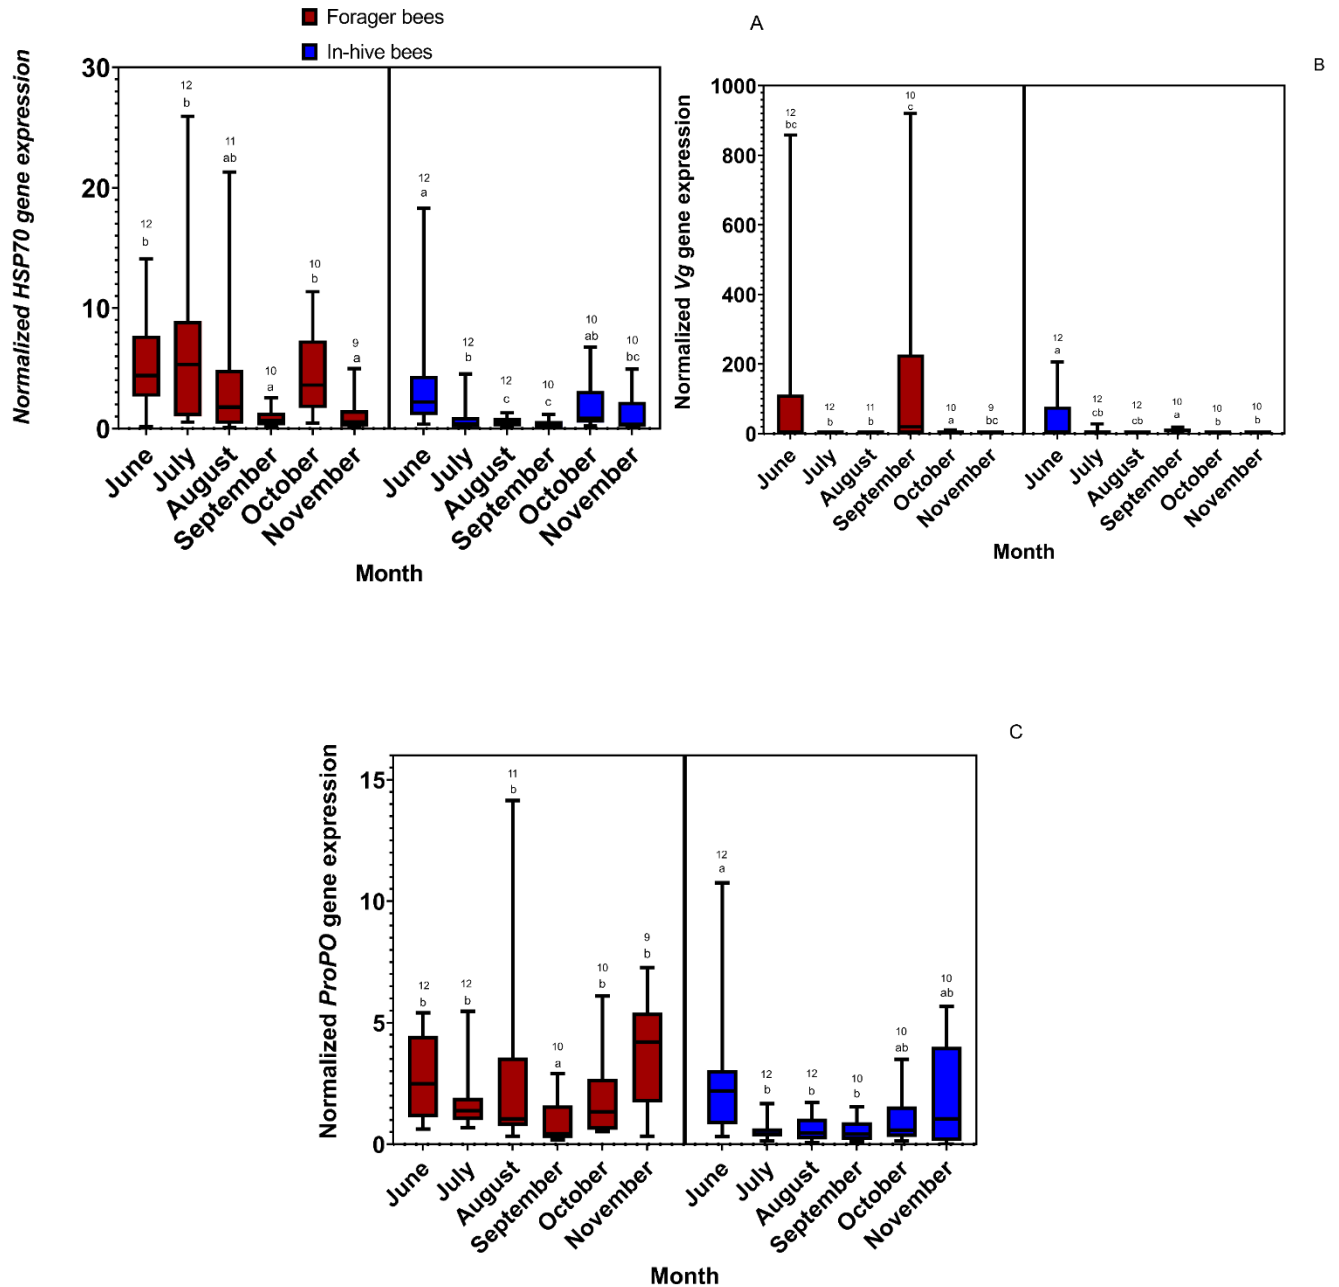

**Table S3.** The statistical results from a multivariate spearman rank analysis between Variables X and Y. The last column visualizes the strength of the relationship between the two variables corresponding to the spearman rank  $\rho$  value. The \* indicates a significant relationship between the two variables at the  $\alpha = 0.05$  level. *ProPO*: *Prophenoloxidase* gene; *Vg*: *Vitellogenin* gene; *HSP70*: *Heat Shock Protein 70* gene; FOB: Frames of Bees; AQI: Air Quality Index;

| Variable X   | Variable Y | Spearman $\rho$ | P-value | Strength of $\rho$ value |
|--------------|------------|-----------------|---------|--------------------------|
| HSP70        | Nosema     | -0.0044         | 0.9724  |                          |
| Vg           | Nosema     | 0.0702          | 0.5813  |                          |
| Vg           | HSP70      | -0.1605         | 0.2052  |                          |
| ProPO        | Nosema     | 0.2715          | 0.0300* |                          |
| ProPO        | HSP70      | 0.2993          | 0.0163* |                          |
| ProPO        | Vg         | 0.2369          | 0.0595  |                          |
| AQI          | Nosema     | 0.0781          | 0.5398  |                          |
| AQI          | HSP70      | -0.2438         | 0.0523  |                          |
| AQI          | Vg         | 0.2600          | 0.0380* |                          |
| AQI          | ProPO      | -0.2839         | 0.0230* |                          |
| Max_Temp     | Nosema     | -0.1463         | 0.2486  |                          |
| Max_Temp     | HSP70      | 0.2041          | 0.1058  |                          |
| Max_Temp     | Vg         | -0.0073         | 0.9542  |                          |
| Max_Temp     | ProPO      | -0.0930         | 0.4651  |                          |
| Max_Temp     | AQI        | 0.2766          | 0.0270* |                          |
| FOB          | Nosema     | 0.2001          | 0.1129  |                          |
| FOB          | HSP70      | 0.0096          | 0.9399  |                          |
| FOB          | Vg         | 0.0896          | 0.4815  |                          |
| FOB          | ProPO      | -0.0768         | 0.5461  |                          |
| FOB          | AQI        | 0.1446          | 0.2543  |                          |
| FOB          | Max_Temp   | 0.4927          | <.0001* |                          |
| Varroa mites | Nosema     | 0.5148          | <.0001* |                          |
| Varroa mites | HSP70      | -0.1247         | 0.3385  |                          |
| Varroa mites | Vg         | -0.2197         | 0.0888  |                          |
| Varroa mites | ProPO      | 0.0037          | 0.9773  |                          |
| Varroa mites | AQI        | 0.0289          | 0.8252  |                          |
| Varroa mites | Max_Temp   | -0.3360         | 0.0081* |                          |
| Varroa mites | FOB        | -0.0373         | 0.7756  |                          |
| Adult_Bees   | Nosema     | 0.4004          | 0.0385* |                          |
| Adult_Bees   | HSP70      | 0.0965          | 0.6321  |                          |
| Adult_Bees   | Vg         | -0.0009         | 0.9964  |                          |

|            |              |         |         |  |
|------------|--------------|---------|---------|--|
| Adult_Bees | ProPO        | 0.1884  | 0.3467  |  |
| Adult_Bees | AQI          | -0.0703 | 0.7275  |  |
| Adult_Bees | Max_Temp     | 0.3070  | 0.1193  |  |
| Adult_Bees | FOB          | 0.9403  | <.0001* |  |
| Adult_Bees | Varroa mites | 0.0997  | 0.6354  |  |
| Brood      | Nosema       | 0.3732  | 0.0552  |  |
| Brood      | HSP70        | 0.2169  | 0.2772  |  |
| Brood      | Vg           | -0.1808 | 0.3667  |  |
| Brood      | ProPO        | 0.3131  | 0.1118  |  |
| Brood      | AQI          | -0.1623 | 0.4185  |  |
| Brood      | Max_Temp     | 0.2880  | 0.1452  |  |
| Brood      | FOB          | 0.8234  | <.0001* |  |
| Brood      | Varroa mites | 0.1467  | 0.4842  |  |
| Brood      | Adult_Bees   | 0.8739  | <.0001* |  |
| Honey      | Nosema       | 0.2759  | 0.1636  |  |
| Honey      | HSP70        | -0.0879 | 0.6627  |  |
| Honey      | Vg           | -0.1146 | 0.5693  |  |
| Honey      | ProPO        | 0.0619  | 0.7591  |  |
| Honey      | AQI          | 0.1637  | 0.4144  |  |
| Honey      | Max_Temp     | -0.1015 | 0.6144  |  |
| Honey      | FOB          | 0.5491  | 0.0030* |  |
| Honey      | Mites        | 0.5759  | 0.0026* |  |
| Honey      | Adult_Bees   | 0.4189  | 0.0296* |  |
| Honey      | Brood        | 0.3295  | 0.0933  |  |
| Nectar     | Nosema       | 0.4780  | 0.0117* |  |
| Nectar     | HSP70        | 0.0530  | 0.7928  |  |
| Nectar     | Vg           | -0.1980 | 0.3222  |  |
| Nectar     | ProPO        | 0.0898  | 0.6560  |  |
| Nectar     | AQI          | -0.1276 | 0.5260  |  |
| Nectar     | Max_Temp     | -0.3106 | 0.1148  |  |
| Nectar     | FOB          | 0.6007  | 0.0009* |  |
| Nectar     | Varroa mites | 0.3737  | 0.0657  |  |
| Nectar     | Adult_Bees   | 0.4339  | 0.0237* |  |
| Nectar     | Brood        | 0.3851  | 0.0473* |  |
| Nectar     | Honey        | 0.6315  | 0.0004* |  |
| Pollen     | Nosema       | 0.2858  | 0.1484  |  |
| Pollen     | HSP70        | 0.4075  | 0.0349* |  |

|        |              |         |         |  |
|--------|--------------|---------|---------|--|
| Pollen | Vg           | 0.1634  | 0.4154  |  |
| Pollen | ProPO        | 0.2419  | 0.2241  |  |
| Pollen | AQI          | -0.2920 | 0.1395  |  |
| Pollen | Max_Temp     | 0.2195  | 0.2713  |  |
| Pollen | FOB          | 0.5338  | 0.0041* |  |
| Pollen | Varroa mites | -0.2024 | 0.3319  |  |
| Pollen | Adult_Bees   | 0.6517  | 0.0002* |  |
| Pollen | Brood        | 0.6620  | 0.0002* |  |
| Pollen | Honey        | -0.1480 | 0.4612  |  |
| Pollen | Nectar       | 0.1116  | 0.5795  |  |
| Empty  | Nosema       | -0.4749 | 0.0123* |  |
| Empty  | HSP70        | -0.0880 | 0.6626  |  |
| Empty  | Vg           | 0.2144  | 0.2828  |  |
| Empty  | ProPO        | -0.1283 | 0.5236  |  |
| Empty  | AQI          | -0.0203 | 0.9201  |  |
| Empty  | Max_Temp     | -0.1038 | 0.6063  |  |
| Empty  | FOB          | -0.8949 | <.0001* |  |
| Empty  | Varroa mites | -0.4336 | 0.0304* |  |
| Empty  | Adult_Bees   | -0.8458 | <.0001* |  |
| Empty  | Brood        | -0.7880 | <.0001* |  |
| Empty  | Honey        | -0.7037 | <.0001* |  |
| Empty  | Nectar       | -0.6997 | <.0001* |  |
| Empty  | Pollen       | -0.3946 | 0.0417* |  |

## References

1. Burgher-MacLellan, K.L.; Williams, G.R.; Shutler, D.; MacKenzie, K.; Rogers, R.E.L. Optimization of Duplex Real-Time PCR with Meltingcurve Analysis for Detecting the Microsporidian Parasites *Nosema apis* and *Nosema ceranae* in *Apis mellifera*. *The Canadian Entomologist* **2010**, *142*, 271-283, 213.
2. Morammazi, S.; Shokrollahi, B. The pattern of HSP70 gene expression, flight activity and temperature in *Apis mellifera* media colonies. *J Therm Biol* **2020**, *91*, 102647, doi:10.1016/j.jtherbio.2020.102647.
3. Hamiduzzaman, M.M.; Emsen, B.; Hunt, G.J.; Subramanyam, S.; Williams, C.E.; Tsuruda, J.M.; Guzman-Novoa, E. Differential Gene Expression Associated with Honey Bee Grooming Behavior in Response to Varroa Mites. *Behav Genet* **2017**, *47*, 335-344, doi:10.1007/s10519-017-9834-6.
4. Zaobidna, E.A.; Żółtowska, K.; Łopieńska-Biernat, E. Expression of the Prophenoloxidase Gene and Phenoloxidase Activity, During the Development of *Apis Mellifera* Brood Infected with Varroa Destructor. *J. Apic. Sci.* **2015**, *59*, 85-93, doi:10.1515/jas-2015-0025.
